# Supplementary material for: Electrocatalytic activity of carbon spheres towards NADH oxidation at low overpotential and its applications in biosensors and biofuel cells
Source: Royal Society of Chemistry journal article supplement (doi:10.1039/c1ra00444a), 2011-01-01
Supplement: c1ra00444a.pdf [file c1ra00444a.pdf]

## Supporting Information

### **Electrocatalytic Activity of Carbon Spheres towards NADH Oxidation at Low Overpotential and Its Applications in Biosensors and Biofuel Cells**

**Feng Gao,<sup>\*</sup> Xinying Guo, Jun Yin, Dan Zhao, Maoguo Li, Lun Wang**

*Anhui Key Laboratory of Chemo/Biosensing, Anhui Key Laboratory of Functional Molecular Solids, College of Chemistry and Materials Science, Anhui Normal University, Wuhu 241000, P. R. China*

<sup>\*</sup>To whom correspondence should be addressed.

Dr. Prof. Feng Gao, Tel./Fax: +86-553-3869302, E-mail: [fgao@mail.ahnu.edu.cn](mailto:fgao@mail.ahnu.edu.cn).

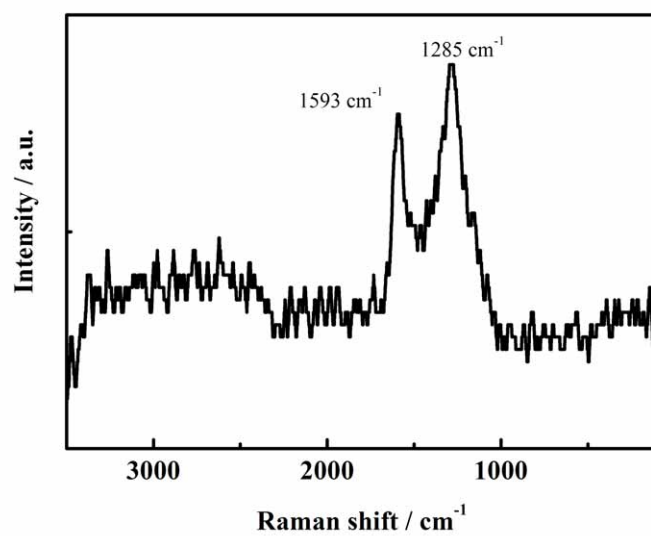

**Figure S1.** Raman spectra of carbon double-shelled hollow spheres.

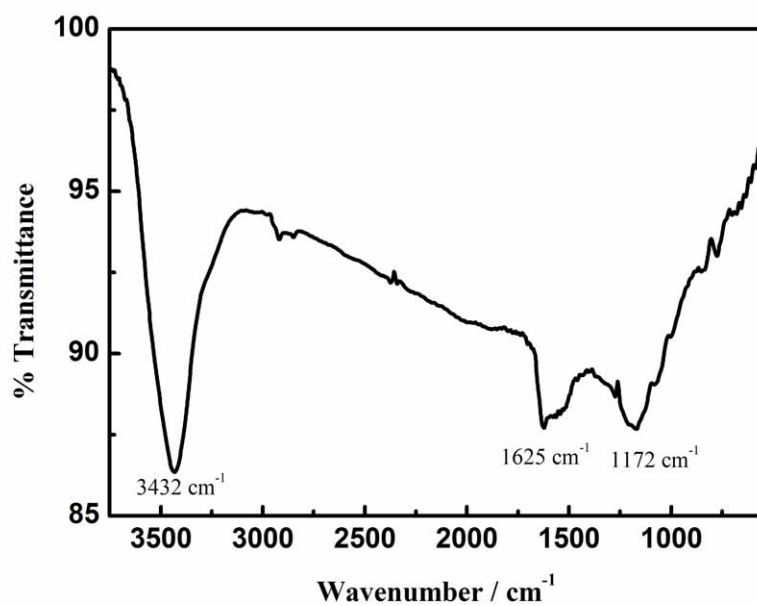

**Figure S2.** IR spectra in KBr of the carbon double-shelled hollow spheres.

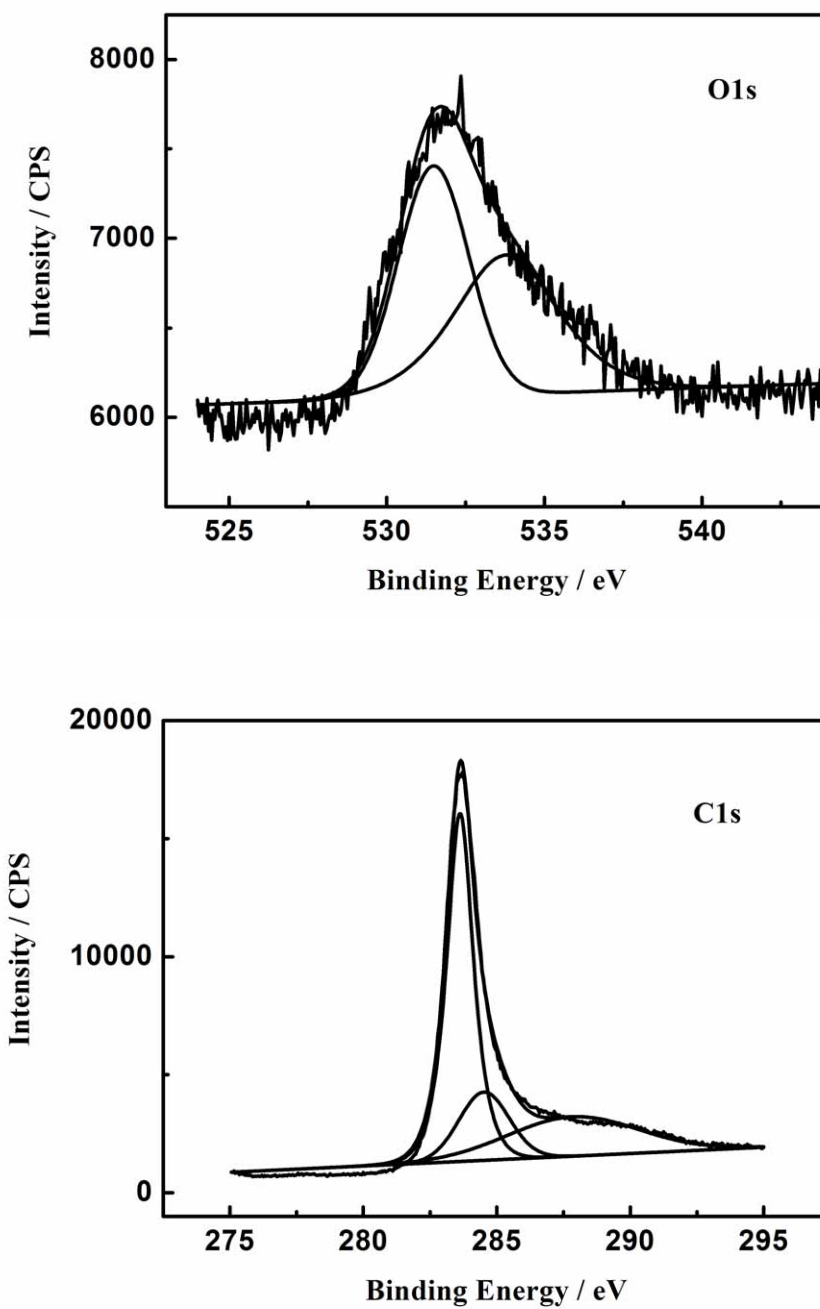

**Figure S3.** XPS spectra of the carbon double-shelled hollow spheres samples.

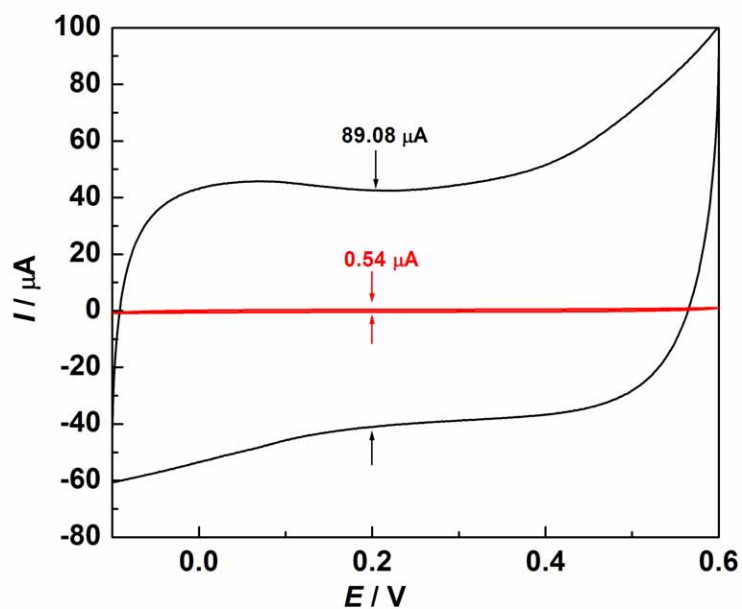

**Figure S4.** Cyclic voltammograms obtained at CS-coated (black line), and bare GC (red line) electrode in 0.1M phosphate buffer (pH 7.0) containing 0.1 M KCl with a scan rate of 300  $\text{mV s}^{-1}$ . The current values represent the sum of the charge current in the positive and negative scan directions at CS-coated and bare GC electrodes, correspondingly. The charge currents were measured at +0.2 V.

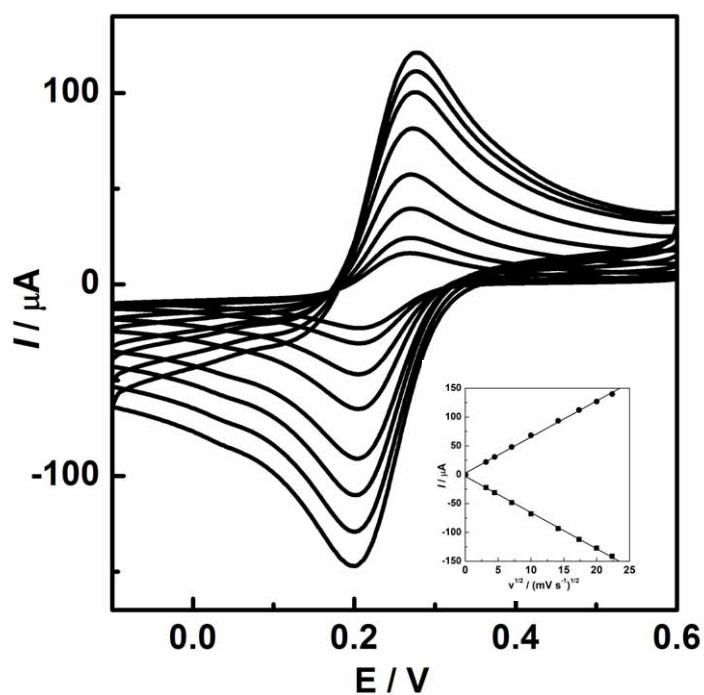

**Figure S5.** Cyclic voltammograms obtained at CS-coated GC electrode in 0.1M phosphate buffer (pH 7.0) containing 5mM  $\text{Fe}(\text{CN})_6^{3-}$  at different scan rate, from inside to outside: 10, 20, 50, 100, 200, 300, 400, and 500  $\text{mV s}^{-1}$ , respectively. The linear dependence of peak current on the square root of scan rate is shown in inset.

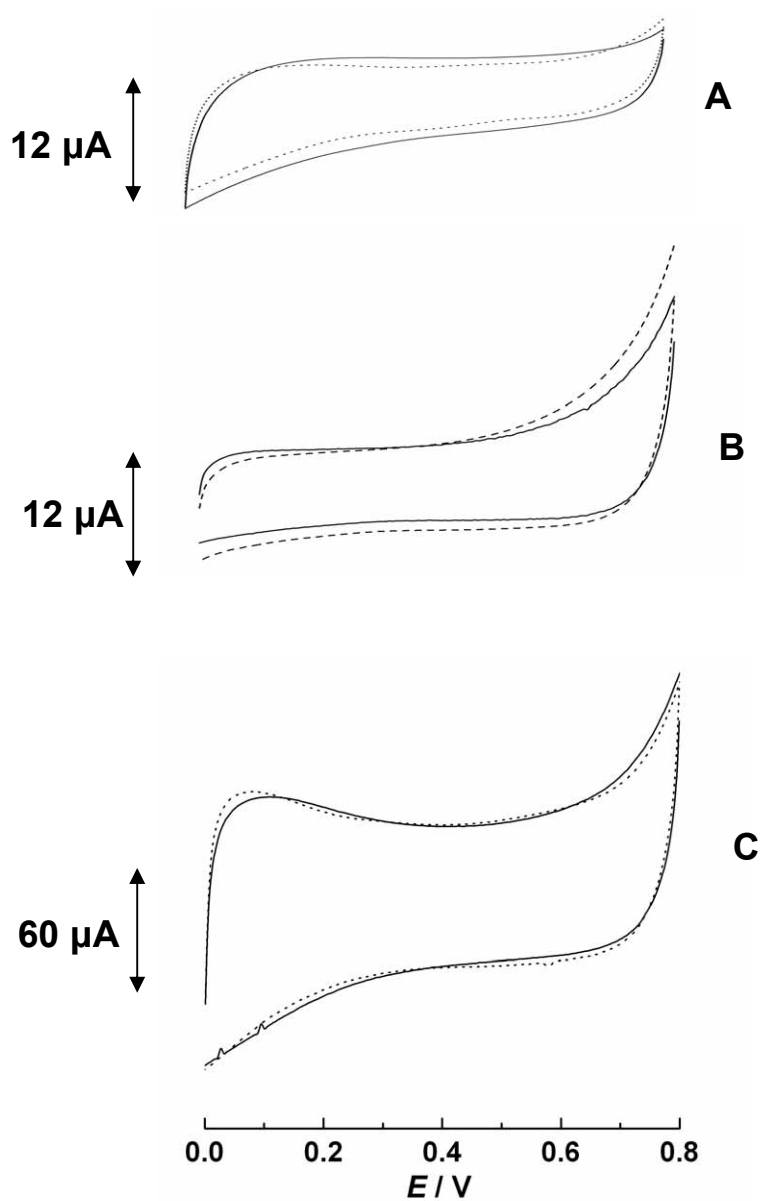

**Figure S6.** CVs obtained at bare GC(A), BOD-GC(B), and CS/GC electrode in  $\text{N}_2$ -saturated (solid line) or  $\text{O}_2$ -saturated (dotted line) atmosphere in 0.10 M phosphate buffer (pH 7.0) with a scan rate of  $10 \text{ mV s}^{-1}$ .
